# Supplementary material for: RNA-seq-based transcriptome analysis of the anti-inflammatory effect of artesunate in the early treatment of the mouse cerebral malaria model
Source: Royal Society of Chemistry journal article supplement (doi:10.1039/d1mo00491c), 2022-06-23
Supplement: d1mo00491c1.pdf [file d1mo00491c1.pdf]

**Supplementary Fig.1** GO analysis of cellular component (CC) and molecular function (MF) of DEGs in brain tissues between Uninfected mice, *Pb ANKA* group and *Pb ANKA* +AST group mice. Top 5 GO terms of CC based on up-regulated (red columnar) and down-regulated (green columnar) DEGs between the *Pb ANKA* group and Uninfected group(a,b), *Pb ANKA*+ AST group and Uninfected group(e,f), and *Pb ANKA*+ AST group and *Pb ANKA* group (i, j). Top 5 GO terms of MF based on up-regulated and down-regulated DEGs between the *Pb ANKA* group and Uninfected group(c,d), *Pb ANKA*+ AST group and Uninfected group (g,h), and *Pb ANKA*+ AST group and *Pb ANKA* group (k,l).

**Supplementary Table 1 Comparison result statistics**

| Statistics                        | All     | UnMapped | Mapped  | MappedRate | UniqueMapped | UniqueMappedRate | MultiMapped |
|-----------------------------------|---------|----------|---------|------------|--------------|------------------|-------------|
| <i>Pb ANKA</i> group +AST group_1 | 4498969 | 757240   | 4423245 | 0.983      | 41008772     | 0.912            | 3223682     |
| <i>Pb ANKA</i> group +AST group_2 | 4       |          | 4       |            |              |                  |             |
| <i>Pb ANKA</i> group +AST group_3 | 3533870 | 566926   | 3477177 | 0.984      | 32174734     | 0.91             | 2597044     |
| <i>Pb ANKA</i> group +AST group_4 | 4       |          | 8       |            |              |                  |             |
| Uninfected group_1                | 3792477 | 584390   | 3734038 | 0.985      | 34652184     | 0.914            | 2688200     |
| Uninfected group_2                | 4       |          | 4       |            |              |                  |             |
| Uninfected group_3                | 3754844 | 588996   | 3695945 | 0.984      | 34073024     | 0.907            | 2886426     |
| Uninfected group_4                | 6       |          | 0       |            |              |                  |             |
| <i>Pb ANKA</i> group _1           | 4560085 | 785658   | 4481519 | 0.983      | 41469532     | 0.909            | 3345664     |
| <i>Pb ANKA</i> group _2           | 4       |          | 6       |            |              |                  |             |
| <i>Pb ANKA</i> group _3           | 3845635 | 666594   | 3778976 | 0.983      | 34967168     | 0.909            | 2822594     |
| <i>Pb ANKA</i> group _4           | 6       |          | 2       |            |              |                  |             |
| Uninfected group_1                | 3413411 | 743108   | 3339100 | 0.978      | 30604382     | 0.897            | 2786626     |
| Uninfected group_2                | 6       |          | 8       |            |              |                  |             |
| Uninfected group_3                | 4110934 | 931484   | 4017785 | 0.977      | 36268486     | 0.882            | 3909372     |
| Uninfected group_4                | 2       |          | 8       |            |              |                  |             |
| <i>Pb ANKA</i> group _1           | 3428139 | 739222   | 3354217 | 0.978      | 30563622     | 0.892            | 2978552     |
| <i>Pb ANKA</i> group _2           | 6       |          | 4       |            |              |                  |             |
| <i>Pb ANKA</i> group _3           | 3792167 | 1015370  | 3690630 | 0.973      | 31277234     | 0.825            | 5629068     |
| <i>Pb ANKA</i> group _4           | 2       |          | 2       |            |              |                  |             |
| Uninfected group_1                | 3665481 | 931354   | 3572346 | 0.975      | 31718562     | 0.865            | 4004898     |
| Uninfected group_2                | 4       |          | 0       |            |              |                  |             |
| Uninfected group_3                | 4713722 | 856652   | 4628057 | 0.982      | 42779192     | 0.908            | 3501382     |
| Uninfected group_4                | 6       |          | 4       |            |              |                  |             |

**Supplementary Table 2 Quality assessment of raw reads and clean reads**

| Sample Name                 | Raw Reads | Clean Reads | Raw Bases(G) | Clean Bases(G) | Q20(%) | Q30(%) | GC Content(%) |
|-----------------------------|-----------|-------------|--------------|----------------|--------|--------|---------------|
| <i>Pb ANKA</i> +AST group_1 | 52849766  | 44989694    | 7.93         | 6.75           | 98.66  | 95.06  | 49.92         |
| <i>Pb ANKA</i> +AST group_2 | 41996580  | 35338704    | 6.30         | 5.30           | 98.52  | 94.63  | 49.77         |
| <i>Pb ANKA</i> +AST group_3 | 44170676  | 37924774    | 6.63         | 5.69           | 98.69  | 95.12  | 49.59         |
| <i>Pb ANKA</i> +AST group_4 | 43705964  | 37548446    | 6.56         | 5.63           | 98.73  | 95.22  | 49.46         |
| Uninfected group_1          | 50557468  | 45600854    | 7.58         | 6.84           | 99.17  | 96.50  | 48.96         |
| Uninfected group_2          | 44980010  | 38456356    | 6.75         | 5.77           | 98.63  | 94.91  | 49.12         |
| Uninfected group_3          | 40091818  | 34134116    | 6.01         | 5.12           | 98.69  | 95.09  | 47.76         |
| Uninfected group_4          | 47874512  | 41109342    | 7.18         | 6.17           | 98.71  | 95.07  | 44.4          |
| <i>Pb ANKA</i> group_1      | 40805812  | 34281396    | 6.12         | 5.14           | 98.53  | 94.65  | 47.85         |
| <i>Pb ANKA</i> group_2      | 45593008  | 37921672    | 6.84         | 5.69           | 98.55  | 94.67  | 44.11         |
| <i>Pb ANKA</i> group_3      | 43545578  | 36654814    | 6.53         | 5.5            | 98.66  | 94.98  | 45.05         |
| <i>Pb ANKA</i> group_4      | 55218062  | 47137226    | 8.28         | 7.07           | 98.72  | 95.24  | 49.94         |

**Supplementary Table 3 Top 10 enriched BP terms of up-regulated DEGs between ECM and control mice.( *Pb ANKA* group & Uninfected group)**

| ID         | Term                                 | DEGS                                                          | p-value     | FDR         | Enrichment  |
|------------|--------------------------------------|---------------------------------------------------------------|-------------|-------------|-------------|
| GO:0002376 | immune system process                | <i>Il-10,Il-1<math>\beta</math>,Il-21,Il-6,Icam1,Ifng,Tnf</i> | 3.521E-186  | 2.4619E-182 | 5.103538403 |
| GO:0006955 | immune response                      | <i>Il-10,Il-1<math>\beta</math>,Il-21,Il-6,Icam1,Ifng,Tnf</i> | 1.028E-126  | 3.5938E-123 | 5.778647302 |
| GO:0006952 | defense response                     | <i>Il-10,Il-1<math>\beta</math>,Il-6,Icam1,Ifng,Tnf</i>       | 3.6147E-121 | 8.4246E-118 | 4.984001913 |
| GO:0043207 | response to external biotic stimulus | <i>Il-10,Il-1<math>\beta</math>,Il-6,Ifng,Tnf</i>             | 8.8806E-121 | 1.5523E-117 | 4.776020564 |

|            |                                              |                                               |             |             |             |
|------------|----------------------------------------------|-----------------------------------------------|-------------|-------------|-------------|
| GO:0009607 | response to biotic stimulus                  | <i>Il-10,Il-1β,Il-6,Ifng,Tnf</i>              | 1.2222E-119 | 1.7091E-116 | 4.695741641 |
| GO:0002682 | Regulation of immune system process          | <i>Il-10,Il-1β,Il-6,Il-21, Icam1,Ifng,Tnf</i> | 4.416610772 | 5.4927E-114 | 4.416610772 |
| GO:0051707 | response to other organism interspecies      | <i>Il-10,Il-6,Ifng,Tnf</i>                    | 7.6313E-106 | 7.6226E-103 | 5.024776338 |
| GO:0044419 | interaction between organisms                | <i>Il-10,Il-6,Icam1,Ifng,Tnf</i>              | 1.1294E-99  | 9.87113E-97 | 4.444049743 |
| GO:0009605 | response to external stimulus                | <i>Il-10,Il-1β,Il-6,Ifng,Tnf</i>              | 1.30829E-96 | 1.0164E-93  | 3.413583066 |
| GO:0002684 | positive regulation of immune system process | <i>Il-10,Il-1β,Il-6,Il-21, Icam1,Ifng,Tnf</i> | 8.79779E-95 | 6.15141E-92 | 5.111260469 |

Enrichment: (GeneInListInTerm/GeneInList)/(GeneInTerm/TotalGene)

**Supplementary Table 4 Top 10 enriched BP terms of down-regulated DEGs between artesunate-treated and CM mice.( *Pb* ANKA group & *Pb* ANKA +AST group)**

| ID         | Term                                         | DEGS                             | p-value     | FDR         | Enrichment  |
|------------|----------------------------------------------|----------------------------------|-------------|-------------|-------------|
| GO:0002376 | immune system process                        | <i>Il-10,Il-21,Il-6,Ifng,Tnf</i> | 1.76268E-96 | 1.10414E-92 | 4.258981292 |
| GO:0002682 | regulation of immune system process          | <i>Il-10,Il-21,Il-6,Ifng,Tnf</i> | 2.6241E-60  | 8.21869E-57 | 3.736070807 |
| GO:0006955 | immune response                              | <i>Il-10,Il-21,Il-6,Ifng,Tnf</i> | 9.72121E-56 | 2.02979E-52 | 4.405846244 |
| GO:0043207 | response to external biotic stimulus         | <i>Il-10,Il-6,Ifng,Tnf</i>       | 3.758267584 | 5.84131E-55 | 9.14749E-52 |
| GO:0009607 | response to biotic stimulus                  | <i>Il-10,Il-6,Ifng,Tnf</i>       | 8.25924E-55 | 1.03472E-51 | 3.71143134  |
| GO:0006952 | defense response                             | <i>Il-10,Il-6,Ifng,Tnf</i>       | 8.42308E-53 | 8.7937E-50  | 3.831440516 |
| GO:0051707 | response to other organism                   | <i>Il-10,Il-6,Ifng,Tnf</i>       | 9.87351E-52 | 8.83538E-49 | 4.060439488 |
| GO:0002684 | positive regulation of immune system process | <i>Il-10,Il-21,Il-6,Ifng,Tnf</i> | 4.20857E-51 | 3.29531E-48 | 4.314863358 |
| GO:0050776 | regulation of immune response                | <i>Il-10,Il-21,Il-6,Ifng,Tnf</i> | 4.785022491 | 1.34423E-50 | 9.35583E-48 |

|            |                                                  |                                                     |                 |             |            |
|------------|--------------------------------------------------|-----------------------------------------------------|-----------------|-------------|------------|
| GO:0044419 | interspecies<br>interaction between<br>organisms | <i>Il-10, Il-6, Ifn<math>\gamma</math>,<br/>Tnf</i> | 1.69802E-<br>49 | 1.06364E-46 | 3.64852173 |
|------------|--------------------------------------------------|-----------------------------------------------------|-----------------|-------------|------------|

Enrichment: (GeneInListInTerm/GeneInList)/(GeneInTerm/TotalGene)

**Supplementary Table 5 Primer sequences of genes used for quantitative real-time reverse transcription-polymerase chain reaction assays**

| Primer                          | Sequences 5'-3'              | Size(bp) |
|---------------------------------|------------------------------|----------|
| <i>Il-1<math>\beta</math></i>   | FP_AATGACCTGTTCTTTGAAGTTGA   | 115      |
|                                 | RP_TGATGTGCTGCTGCGAGATTGAAG  |          |
| <i>Il-6</i>                     | FP_TCGGAGGCTTAATTACACATGTTC  | 66       |
|                                 | RP_TGCCATTGCACAACCTCTTTTCT   |          |
| <i>Il-10</i>                    | FP_AGCCGGGAAGACAATAACTG      | 189      |
|                                 | RP_CATTTCCGATAAGGCTTGG       |          |
| <i>Tnf-<math>\alpha</math></i>  | FP_CCCTCACACTCAGATCATCTTCT   | 61       |
|                                 | RP_GCTACGACGTGGGCTACAG       |          |
| <i>Ifn-<math>\gamma</math></i>  | FP_GGAACTGGCAAAGGATGGTGAC    | 219      |
|                                 | RP_GCTGGACCTGTGGGTTGTTGAC    |          |
| <i>Il-21</i>                    | FP_TCATCATTGACCTCGTGGCCC     | 311      |
|                                 | RP_ATCGTACTTCTCCACTTGCAATCCC |          |
| <i>Icam-1</i>                   | FP_AGGTATCCATCCATCCCACA      | 206      |
|                                 | RP_GCCACAGTTCTCAAAGCACA      |          |
| <i><math>\beta</math>-actin</i> | FP_TGGAATCCTGTGGCATCCATGAAAC | 349      |
|                                 | RP_TAAAACGCAGCTCAGTAACAGTCCG |          |
